# Supplementary material
Source: PubMed Central journal article supplement (PMC384705)
Supplement: pnas_101_12_4124__1.pdf [file pnas_101_12_4124__1.pdf]

**Table 1. Strains used in this study**

| Strain  | Genotype                                                                                            | Source     |
|---------|-----------------------------------------------------------------------------------------------------|------------|
| KLY1546 | <i>MATa his3-11,15 leu2-3,112 trp1-1 ura3-1</i>                                                     | Lab stock* |
| KLY4071 | KLY1546 <i>HSL1-Myc<sub>13</sub>::HIS3</i>                                                          | This study |
| KLY4536 | KLY4071 <i>cla4Δ::LEU2</i>                                                                          | This study |
| KLY4497 | KLY1546 <i>cdc5Δ::HphMX4 HSL1-Myc<sub>13</sub>::HIS3MX6</i><br>+ YCplac33- <i>GAL1-HA-EGFP-PLK1</i> | This study |
| KLY4532 | KLY4497 + YCplac111- <i>CDC5</i>                                                                    | This study |
| KLY4533 | KLY4497 + pRS315- <i>CDC5ΔC-CNM67</i>                                                               | This study |
| KLY4816 | KLY1546 <i>cdc5Δ::HphMX4</i> + YCplac111- <i>EGFP-CDC5</i>                                          | This study |
| KLY4438 | KLY1546 <i>cdc5Δ::HphMX4</i> + YCplac33- <i>GAL1-HA-EGFP<sub>2</sub>-cdc5-1</i>                     | This study |
| KLY4864 | KLY4438 <i>HSL1-Myc<sub>13</sub>::HIS3MX6</i>                                                       | This study |
| KLY4899 | KLY4864 + YCplac111                                                                                 | This study |
| KLY4900 | KLY4864 + YCplac111- <i>CDC5</i>                                                                    | This study |
| KLY4649 | KLY1546 <i>cla4Δ::LEU2</i>                                                                          | This study |
| KLY4903 | KLY4649 <i>URA3::YFP-CDC10</i>                                                                      | This study |
| KLY5247 | KLY4438 + YCplac111 + YCpT- <i>GFP-HSL7</i>                                                         | This study |
| KLY5248 | KLY4438 + YCplac111- <i>CDC5</i> + YCpT- <i>GFP-HSL7</i>                                            | This study |
| KLY4913 | KLY4903 + YEplac24- <i>CLA4</i>                                                                     | This study |
| KLY4914 | KLY4903 + YEplac24- <i>cla4-as3</i>                                                                 | This study |
| KLY5004 | KLY4649 + YEplac24- <i>CLA4</i> + pRS316- <i>GFP-HSL7</i>                                           | This study |
| KLY5006 | KLY4649 + YEplac24- <i>cla4-as3</i> + pRS316- <i>GFP-HSL7</i>                                       | This study |
| KLY4651 | KLY1546 <i>cdc5Δ::KanMX6 TRP1::cdc5-3</i><br><i>HIS3::CDC14<sup>TAB6-1</sup></i>                    | This study |
| KLY4653 | KLY1546 <i>cdc5Δ::KanMX6 TRP1::cdc5-3</i><br><i>HIS3::CDC14<sup>TAB6-1</sup> cla4Δ::LEU2</i>        | This study |

|         |                                                                                                                          |                     |
|---------|--------------------------------------------------------------------------------------------------------------------------|---------------------|
| KLY2868 | KLY1546 <i>hsl1Δ::URA3</i>                                                                                               | Ref. 1              |
| KLY5098 | KLY1546 <i>hsl1Δ::URA3 cla4Δ::LEU2</i>                                                                                   | This study          |
| KLY4756 | KLY4653 <i>swe1Δ::HphMX4</i>                                                                                             | This study          |
| KLY4757 | KLY4756 + pRS316                                                                                                         | This study          |
| KLY4758 | KLY4756 + pRS316- <i>SWE1</i>                                                                                            | This study          |
| KLY5097 | KLY1546 <i>hsl1Δ::URA3 cla4Δ::LEU2 swe1Δ::HphMX4</i>                                                                     | This study          |
| KLY5222 | KLY5097 + pRS313                                                                                                         | This study          |
| KLY5223 | KLY5097 + pRS313- <i>SWE1</i>                                                                                            | This study          |
| KLY4714 | KLY4438 + YCplac22                                                                                                       | This study          |
| KLY4715 | KLY4438 + YCplac22- <i>CDC5</i>                                                                                          | This study          |
| KLY4811 | KLY4714 <i>cla4Δ::LEU2</i>                                                                                               | This study          |
| KLY4813 | KLY4715 <i>cla4Δ::LEU2</i>                                                                                               | This study          |
| M600    | <i>MATa/α mih1Δ::LEU2/mihΔ::LEU2 ade1/ade1 his2/his2</i><br><i>trp1-1<sup>a</sup>/trp1-1<sup>a</sup> ura3Δns/ura3Δns</i> | Ref. 2 <sup>†</sup> |
| KLY4802 | M600 <i>URA3/ura3Δns</i>                                                                                                 | This study          |
| KLY4803 | M600 <i>URA3::SWE1-Myc<sub>12</sub>/ura3Δns</i>                                                                          | This study          |
| KLY4804 | M600 <i>URA3::SWE1(20A)-Myc<sub>12</sub>/ura3Δns</i>                                                                     | This study          |
| KLY4805 | M600 <i>URA3::SWE1(12A)-Myc<sub>12</sub>/ura3Δns</i>                                                                     | This study          |
| KLY4806 | M600 <i>URA3::SWE1(c8A)-Myc<sub>12</sub>/ura3Δns</i>                                                                     | This study          |
| KLY4807 | M600 <i>URA3::SWE1(24A)-Myc<sub>12</sub> /ura3Δns</i>                                                                    | This study          |
| KLY4808 | M600 <i>URA3::SWE1(11A)-Myc<sub>12</sub>/ura3Δns</i>                                                                     | This study          |
| KLY4809 | M600 <i>URA3::SWE1(8A)-Myc<sub>12</sub>/ura3Δns</i>                                                                      | This study          |
| KLY4810 | M600 <i>URA3::SWE1(5A)-Myc<sub>12</sub>/ura3Δns</i>                                                                      | This study          |
| KLY5202 | M600 <i>URA3::SWE1-GFP<sub>3</sub>::KanMX6/ura3Δns</i>                                                                   | This study          |
| KLY5126 | M600 <i>URA3::SWE1(20A)-GFP<sub>3</sub>::KanMX6/ura3Δns</i>                                                              | This study          |
| KLY5200 | M600 <i>URA3::SWE1(12A)-GFP<sub>3</sub>::KanMX6/ura3Δns</i>                                                              | This study          |
| KLY5128 | M600 <i>URA3::SWE1(24A)-GFP<sub>3</sub>::KanMX6/ura3Δns</i>                                                              | This study          |

|         |                                                            |                        |
|---------|------------------------------------------------------------|------------------------|
| KLY5261 | M600 <i>URA3/ura3Δns</i> + YEpT- <i>SWE1-GFP</i>           | This study             |
| JC66    | <i>MATa leu2 trp1 ura3</i>                                 | Lab stock <sup>‡</sup> |
| KLY5035 | JC66 + YCplac22                                            | This study             |
| KLY5036 | JC66 + YCplac22- <i>GAL1-EGFP<sub>2</sub>-CDC5ΔDB</i>      | This study             |
| KLY5037 | JC66 + YCplac22- <i>GAL1-EGFP<sub>2</sub>-CDC5ΔDB(FAA)</i> | This study             |

---

\*KLY1546 is in W303-1A genetic background.

<sup>†</sup>M600 is in BF264-15Du genetic background.

<sup>‡</sup>JC66 is in SEY6210 genetic background (gift of J. Chant, Harvard University, Cambridge, MA).

1. Park, C. J., Song, S., Lee, P. R., Shou, W., Deshaies, R. J. & Lee, K. S. (2003) *Genetics* **163**, 21–33.
2. Longtine, M. S., Theesfeld, C. L., McMillan, J. N., Weaver, E., Pringle, J. R. & Lew, D. J. (2000) *Mol. Cell. Biol.* **20**, 4049–4061.
