# Supplementary material
Source: PubMed Central journal article supplement (PMC384705)
Supplement: pnas_101_12_4124__2.pdf [file pnas_101_12_4124__2.pdf]

**Table 2. Plasmids used in this study**

| Name      | Description                                                           | Source     |
|-----------|-----------------------------------------------------------------------|------------|
| pRS306    | <i>URA3</i>                                                           | Ref. 1     |
| pRS315    | CEN <i>LEU2</i>                                                       | Ref.1      |
| pRS316    | CEN <i>URA3</i>                                                       | Ref. 1     |
| YCplac22  | CEN <i>TRP1</i>                                                       | Ref. 2     |
| YCplac111 | CEN <i>LEU2</i>                                                       | Ref. 2     |
| YEplac112 | 2 $\mu$ , <i>TRP1</i>                                                 | Ref. 2     |
| pMJS47    | YCplac22- <i>GFP-HSL7</i>                                             | Ref. 3     |
| pSK615    | YCplac111- <i>CDC5</i>                                                | Ref. 4     |
| pKK625    | YCplac22- <i>CDC5</i>                                                 | Ref. 5     |
| pMJS121   | pGEX-3X- <i>SWE1(K473A)</i>                                           | This study |
| pKL2199   | pBlueBacHis2B- <i>HA-CDC5-Flag</i>                                    | This study |
| pKL2200   | pBlueBacHis2B- <i>HA-CDC5(N209A)-Flag</i>                             | This study |
| pKL2043   | pBlueBacHis2B- <i>HA-CLA4-Flag</i>                                    | This study |
| pKL2241   | pBlueBacHis2B- <i>HA-CLA4(K594A)-Flag</i>                             | This study |
| pSK1359   | YCplac33- <i>GALI-HA-EGFP<sub>2</sub>-cdc5-1</i>                      | This study |
| pSK1362   | YCplac33- <i>GALI-HA-EGFP-PLK1</i>                                    | This study |
| pKL2453   | pRS315- <i>CDC5<math>\Delta</math>C-CNM67</i>                         | This study |
| pKL1763   | pRS306- <i>YFP-CDC10</i>                                              | Ref. 6     |
| pKL2789   | pRS316- <i>GFP-HSL7</i>                                               | This study |
| pKL2701   | YCplac111- <i>EGFP-CDC5</i>                                           | This study |
| pKL2697   | pRS313- <i>SWE1</i>                                                   | This study |
| pKL2698   | pRS316- <i>SWE1</i>                                                   | This study |
| pSK831    | YCplac22- <i>GALI-EGFP<sub>2</sub>-CDC5<math>\Delta</math>DB</i>      | Ref. 6     |
| pSK835    | YCplac22- <i>GALI-EGFP<sub>2</sub>-CDC5<math>\Delta</math>DB(FAA)</i> | Ref. 6     |
| pKL2699   | pUC118- <i>swe1<math>\Delta</math>::HphMX4</i>                        | This study |

|         |                                           |            |
|---------|-------------------------------------------|------------|
| pJM1102 | pRS306- <i>SWE1-Myc<sub>12</sub></i>      | Ref. 7     |
| pKL2739 | pRS306- <i>SWE1(20A)-Myc<sub>12</sub></i> | This study |
| pKL2740 | pRS306- <i>SWE1(12A)-Myc<sub>12</sub></i> | This study |
| pKL2741 | pRS306- <i>SWE1(c8A)-Myc<sub>12</sub></i> | This study |
| pKL2742 | pRS306- <i>SWE1(24A)-Myc<sub>12</sub></i> | This study |
| pKL2743 | pRS306- <i>SWE1(11A)-Myc<sub>12</sub></i> | This study |
| pKL2744 | pRS306- <i>SWE1(8A)-Myc<sub>12</sub></i>  | This study |
| pKL2745 | pRS306- <i>SWE1(5A)-Myc<sub>12</sub></i>  | This study |
| pMJS207 | YE <sub>pT</sub> - <i>SWE1-GFP</i>        | This study |
|         | YE <sub>plac24</sub> - <i>CLA4</i>        | Ref. 8     |
|         | YE <sub>plac24</sub> - <i>cla4-as3</i>    | Ref. 8     |

1. Sikorski, R. S. & Hieter, P. (1989) *Genetics* **122**, 19–27.
2. Gietz, R. D. & Sugino, A. (1988) *Gene* **74**, 527–534.
3. Shulewitz, M. J., Inouye, C. J. & Thorner, J. (1999) *Mol. Cell Biol.* **19**, 7123–7137.
4. Song, S., Grenfell, T. Z., Garfield, S., Erikson, R. L. & Lee, K. S. (2000) *Mol. Cell Biol.* **20**, 286–298.
5. Kitada, K., Johnson, A. L., Johnston, L. H. & Sugino, A. (1993) *Mol. Cell Biol.* **13**, 4445–4457.
6. Song, S. & Lee, K. S. (2001) *J. Cell Biol.* **152**, 451–469.
7. McMillan, J. N., Theesfeld, C. L., Harrison, J. C., Bardes, E. S. & Lew, D. J. (2002) *Mol. Biol. Cell* **13**, 3560–3575.
8. Weiss, E. L., Bishop, A., Shokat, K. M. & Drubin, D. G. (2000) *Nat. Cell Biol.* **2**, 677–685.
