# Supplementary material
Source: PubMed Central journal article supplement (PMC384705)
Supplement: pnas_101_12_4124__16.pdf [file pnas_101_12_4124__16.pdf]

**Table 3. Determination of Cdc5-dependent phosphorylation sites onto GST-Swe1(K473A) *in vitro***

| Peptide | Sequence                                                                                                                                                                                                                                                                                               | Amino acids |
|---------|--------------------------------------------------------------------------------------------------------------------------------------------------------------------------------------------------------------------------------------------------------------------------------------------------------|-------------|
| 1       | QAGEDES*DDFAIGGSTPTNK                                                                                                                                                                                                                                                                                  | 30–49       |
| 2       | IEEEEEEEEEEGKDEES*VDSR                                                                                                                                                                                                                                                                                 | 87–106      |
| 3       | RWS*PFHENESVTTTPITK                                                                                                                                                                                                                                                                                    | 109–125     |
| 4       | WSPFHENES*VTTTPITK                                                                                                                                                                                                                                                                                     | 110–125     |
| 5       | SAEKT*NSPISLK                                                                                                                                                                                                                                                                                          | 127–138     |
| 6       | TENTS*SSSSYSVAK                                                                                                                                                                                                                                                                                        | 152–165     |
| 7       | PNQS*AFTSSGLVSK                                                                                                                                                                                                                                                                                        | 166–179     |
| 8       | <u>M</u> <u>S</u> <u>M</u> <u>D</u> <u>T</u> <u>S</u> <u>L</u> <u>Y</u> <u>P</u> <u>A</u> <u>K</u> 1P                                                                                                                                                                                                  | 180–190     |
| 9       | <u>N</u> <u>A</u> <u>S</u> <u>S</u> <u>S</u> <u>L</u> <u>S</u> <u>V</u> <u>S</u> <u>P</u> <u>L</u> <u>N</u> <u>F</u> <u>V</u> <u>E</u> <u>D</u> <u>N</u> <u>N</u> <u>L</u> <u>Q</u> <u>E</u> <u>D</u> <u>L</u> <u>L</u> <u>F</u> <u>S</u> <u>D</u> <u>S</u> <u>P</u> <u>S</u> <u>S</u> <u>K</u> 2P (S) | 219–250     |
| 10      | <u>N</u> <u>A</u> <u>S</u> <u>S</u> <u>S</u> <u>L</u> <u>S</u> <u>*V</u> <u>S</u> <u>P</u> <u>L</u> <u>N</u> <u>F</u> <u>V</u> <u>E</u> <u>D</u> <u>N</u> <u>N</u> <u>L</u> <u>Q</u> <u>E</u> <u>D</u> <u>L</u> <u>L</u> <u>F</u> <u>S</u> <u>D</u> <u>S</u> <u>P</u> <u>S</u> <u>S</u> <u>K</u>       | 219–250     |
| 11      | ALPS*IHVPTIDSSPLSEAK                                                                                                                                                                                                                                                                                   | 251–269     |
| 12      | HNNQT*NILSPTNSLVTNSSPQTLHSNK                                                                                                                                                                                                                                                                           | 276–302     |
| 13      | HNNQTNILSP <u>T</u> <u>N</u> <u>S</u> <u>L</u> <u>V</u> <u>T</u> <u>N</u> <u>S</u> <u>S</u> <u>P</u> <u>Q</u> <u>T</u> <u>L</u> <u>H</u> <u>S</u> <u>N</u> <u>K</u> 1P (T or S)                                                                                                                        | 276–302     |
| 14      | RKS*IIGATSQTHR                                                                                                                                                                                                                                                                                         | 377–389     |
| 15      | ESRPLS*LSSAIVTNTTSAETHSISSTDSSPLNSK                                                                                                                                                                                                                                                                    | 390–423     |
| 16      | LSANPDS*HLFEK                                                                                                                                                                                                                                                                                          | 432–443     |
| 17      | ILNEV <u>T</u> <u>N</u> <u>Q</u> <u>I</u> <u>T</u> <u>M</u> <u>D</u> <u>Q</u> <u>E</u> <u>G</u> <u>K</u> 1P (T)                                                                                                                                                                                        | 492–507     |
| 18      | LGDFGMATHLPLEDKS*FENEGDR                                                                                                                                                                                                                                                                               | 595–617     |
| 19      | EYIAPEIISDCT*YDYK                                                                                                                                                                                                                                                                                      | 618–633     |
| 20      | LSSTDIHSESLFSDIT*KVDTNDLDFDFER                                                                                                                                                                                                                                                                         | 673–700     |
| 21      | LSSTDIH <u>S</u> <u>E</u> <u>S</u> <u>L</u> <u>F</u> <u>S</u> <u>D</u> <u>I</u> <u>T</u> <u>*K</u> <u>V</u> <u>D</u> <u>T</u> <u>N</u> <u>D</u> <u>L</u> <u>F</u> <u>D</u> <u>F</u> <u>E</u> <u>R</u> 1P (S)                                                                                           | 673–700     |

Phosphorylation sites were determined by nanoelectrospray tandem mass spectrometry. Definitive phosphosites are indicated by an asterisk. Underlined and italicized Ser or Thr indicates potential phosphosites. 1P or 2P indicates the number of phosphate groups in the given peptide, whereas S or T in parenthesis indicates the phosphorylated residues. A Swe1 derivative bearing mutations in the Cdc5 phosphorylation sites [Swe1(20A)] was generated by mutagenizing S36, S102, S111, S118, T131, S156, S169, S185, S223, S225, S254, T280, S288, S379, S395, S438, T501, S610, T629, S682, and T688 to Alanine (A). D. J. Lew and his colleagues (Duke University, Durham, NC) have determined three *in vivo* Swe1 phosphorylation sites, and these sites are identical to the phosphosites on peptides 3–5 (D. J. Lew, personal communication).
