# Supplementary material
Source: PubMed Central journal article supplement (PMC384705)
Supplement: pnas_101_12_4124__17.pdf [file pnas_101_12_4124__17.pdf]

**Table 4. Determination of Cla4-dependent phosphorylation sites onto GST-Swe1(K473A) *in vitro***

| Peptide | Sequence                                                                        | Amino acids |
|---------|---------------------------------------------------------------------------------|-------------|
| 1       | <u>STG</u> TLNLSLSNTALSEANSK 1P (T or S)                                        | 63–82       |
| 2       | WS*PFHENESVTTPIK                                                                | 110–126     |
| 3       | TNSPIS*LK                                                                       | 131–138     |
| 4       | HNNQTNILSP <u>TNS</u> LVTNSSPQTLHSNK 1P (T or S)                                | 276–302     |
| 5       | ARNS*VILK                                                                       | 309–316     |
| 6       | S*IIGATSQTHR                                                                    | 379–389     |
| 7       | ESRPLS*LSSAIVTNTTSAETHSISSTDSSPLNSK                                             | 390–423     |
| 8       | LSANPDS*HLFEK                                                                   | 432–443     |
| 9       | EYIAPEI <u>ISDC</u> TYDYK 1P (S or T)                                           | 618–633     |
| 10      | SGDLSDAGRL <u>SS</u> TDIHSESLFSDITK 1P (S or T)                                 | 664–689     |
| 11      | LSSTDIHSESLFSDIT*KVDTNDLFDLDFER                                                 | 673–700     |
| 12      | LSSTDIH <u>SE</u> <u>SLF</u> <u>SDI</u> <u>TK</u> VDTNDLFDLDFER 2P (S and/or T) | 673–700     |

Phosphorylation sites were determined as in Table 3. A Swe1 derivative bearing mutations in the Cla4 phosphorylation sites [Swe1(12A)] was generated by mutagenizing T66, S111, S136, S288, S312, S379, S395, S438, T629, T676, S682, and T688 to Alanine (A). In peptides 1, 2, 5, 6, 7, and 10–12, there is a Ser (or Thr) situated downstream of an Arg (removed by trypsin digestion) in a context that fits the Cla4 consensus motif (see text); however, other apparent Cla4 sites indicated in these and the other peptides appear to fit a looser consensus, S/T followed by a bulky nonpolar residue at positions +1 or +2. The phosphorylation site in peptide 2 is identical to one of the three *in vivo* phosphorylation sites determined so far (see footnote in Table 3).
