# Supplementary material
Source: PubMed Central journal article supplement (PMC384705)

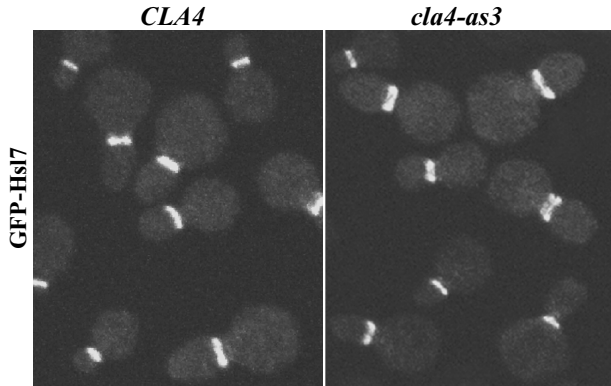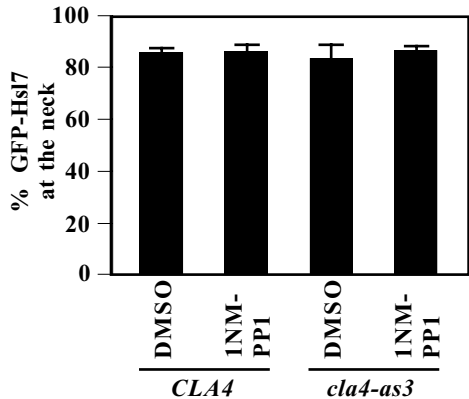

Supplement: pnas_101_12_4124__11.pdf [file pnas_101_12_4124__11.pdf]

**+ vector**

**+ pSWE1**

***hsl1Δ cla4Δ swe1Δ***

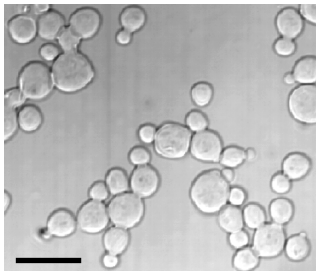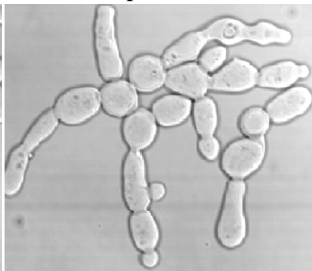

***cdc5-3 CDC14<sup>TAB6-1</sup>  
cla4Δ swe1Δ***

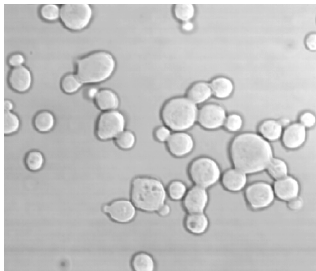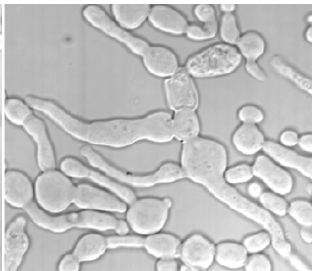

Supplement: pnas_101_12_4124__13.pdf [file pnas_101_12_4124__13.pdf]

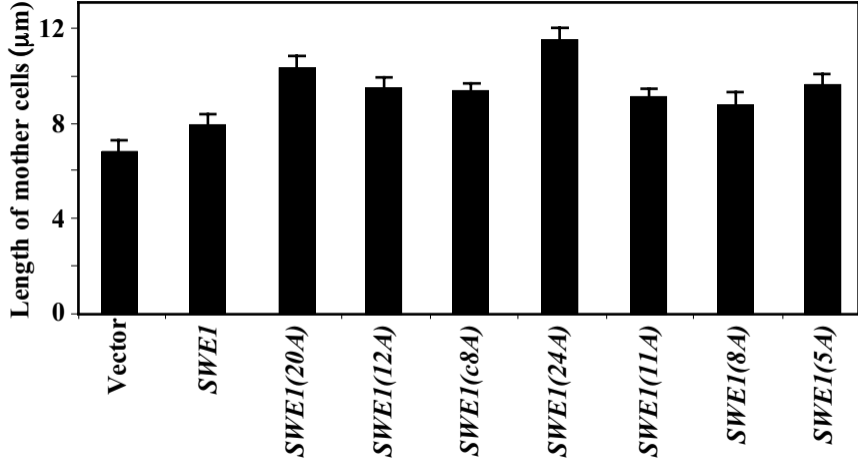

Supplement: pnas_101_12_4124__15.pdf [file pnas_101_12_4124__15.pdf]

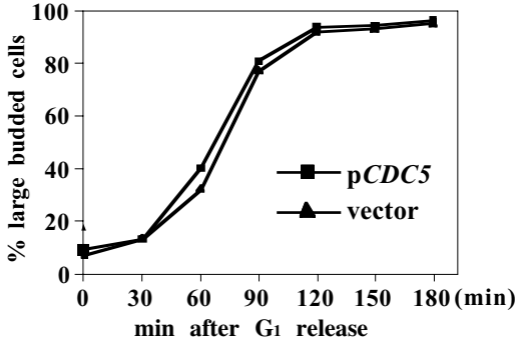

Supplement: pnas_101_12_4124__5.pdf [file pnas_101_12_4124__5.pdf]

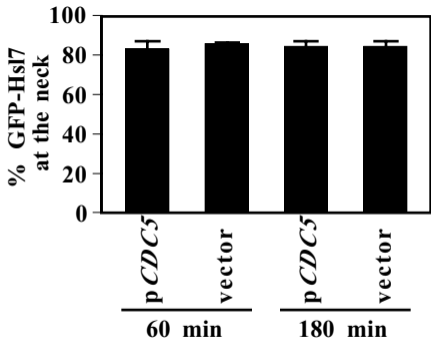

Supplement: pnas_101_12_4124__7.pdf [file pnas_101_12_4124__7.pdf]

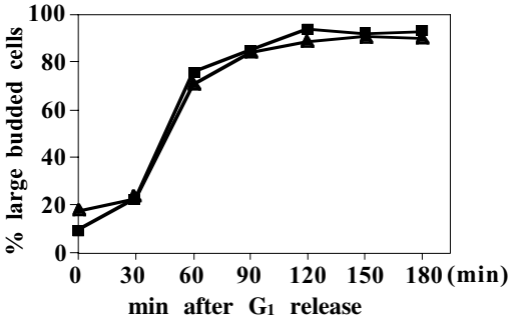

Supplement: pnas_101_12_4124__9.pdf [file pnas_101_12_4124__9.pdf]
